# Supplementary material
Source: HighWire-hosted journal article supplement (https://openheart.bmj.com/content/5/2/e000859)
Supplement: inline-supplementary-material-3 [file inline-supplementary-material-3.docx]

|  | CCPa  (N= 490)c | ACS  (N=  325)c | NCCPb  (N=  749)c | NCCP-K  (N=  356)c | NCCP-U  (N=  393)c | CCP  vs NCCP | ACS vs NCCP | NCCP-K vs NCCP-U |
| --- | --- | --- | --- | --- | --- | --- | --- | --- |
| CABG/PCI n (prop)d | 293 (0.598) | 280 (0.862) | 35 (0.047) | 9 (0.025) | 26 (0.066) | <0.001 | <0.001 | 0.008 |
| CAG/FFR, n (prop)d | 123 (0.251) | 71 (0.218) | 89 (0.119) | 26 (0.073) | 63 (0.160) | <0.001 | <0.001 | <0.001 |
| Non-invasive imaging, n (prop)d | 81 (0.165) | 38 (0.117) | 217 (0.290) | 80 (0.225) | 137 (0.349) | <0.001 | <0.001 | <0.001 |
| Referral to other specialism n (prop)d | 1 (0.002) | 1 (0.003) | 47 (0.063) | 42 (0.118) | 5 (0.013) | <0.001 | <0.001 | <0.001 |
| No inter-vention,  n (%)e | 121 (24.7) | 31  (9.5) | 296 (39.5) | 130 (36.5) | 166 (42.2) | <0.001 | <0.001 | 0.110 |

Supplementary table 3. Diagnostic and treatment interventions performed during first admission and during one year of follow-up

CCP: cardiac chest pain, ACS: acute coronary syndrome, NCCP; non-cardiac chest pain, NCCP-K: NCCP of known origin, NCCP-U: NCCP of unknown origin, CABG: coronary artery bypass graft, PCI: percutaneous coronary intervention, prop: proportion, CAG: coronary angiography without PCI intervention, FFR: functional flow reserve without PCI intervention, Non-invasive imaging included computed tomography scans, single photon emission computed tomography scans, and magnetic resonance imaging.

a CCP includes ACS patients

b NCCP group is a sum of NCCP-K and NCCP-U patients

c 7, 6, 9, and 9 loss of follow-up in the CCP, ACS, NCCP-K and NCCP-U groups respectively

d Some patients had more than one intervention, thus proportion of interventions is given

e Patients with no intervention, thus percentage over group is given
